# Supplementary material
Source: publisher figshare collection journal article supplement (https://gsapubs.figshare.com/ndownloader/files/23307299)
Supplement: Supplementary file 1 [file 23307299]

## Warm and cold wet-states in the western United States during the Plio-Pleistocene

Daniel E. Ibarra<sup>1\*</sup>, Jessica L. Oster<sup>2</sup>, Matthew J. Winnick<sup>3</sup>,  
Jeremy K. Caves Rugestein<sup>1,4</sup>, Michael P. Byrne<sup>5,6</sup>, and C. Page Chamberlain<sup>1</sup>

<sup>1</sup>*Earth System Science, Stanford University, Stanford, California 94305, USA*

<sup>2</sup>*Earth and Environmental Sciences, Vanderbilt University, Nashville, Tennessee 37240, USA*

<sup>3</sup>*Geological Sciences, Stanford University, Stanford, California 94305, USA*

<sup>4</sup>*Earth Sciences, ETH Zürich, 8092 Zürich, Switzerland*

<sup>5</sup>*Institute for Atmospheric and Climate Science, ETH Zürich, 8092 Zürich, Switzerland*

<sup>6</sup>*Space and Atmospheric Physics Group, Imperial College London, London SW7 2AZ, UK*

### Date Repository Contents:

- Scaling of potential evapotranspiration with surface temperature
- Processing of climate model output and NARR dataset
- Dataset Treatment
- Figures DR1-DR3
- Links to databases used for this study
- Tables DR1-DR5
- DR References

### Scaling of potential evapotranspiration with surface temperature

We use climate model experiments to estimate how net surface radiation ( $R_N$ ) and potential evapotranspiration ( $E_p$ ) scale with temperature (Equation 4). To do so we sum the radiation fluxes (Equation 4) to obtain the annual net surface radiation ( $R_N$ ) and calculate average annual temperature for all land grid cells in our domain of interest (30-45 °N, 102-121 °W). We then calculate domain average temperature and  $R_N$  anomalies for the LGM and Pliocene using the PMIP3 and PlioMIP output (Table DR5) relative to the preindustrial control experiments (see next section). We also include 25 CMIP5 climate models using 30-year averages from the historical (1976-2005) and RCP 8.5 (2070-2099) simulations (where the historical period is taken as the control point). The  $R_N$  anomalies are calculated as a percentage change relative to the control.

The potential evapotranspiration calculated from the net surface radiation scales with surface temperature at a rate of 1.6%/K (Figure DR1). For this study we use the net-radiation formulation of potential evapotranspiration (Roderick et al., 2014) and thus use the scaling factor of 1.6%/K for the NARR sensitivity analyses. This regional result derived using the CMIP5, PMIP3 and PlioMIP models is similar to previous work using CMIP3 and CMIP5 models which suggest empirical scalings of  $R_N$  to temperature of ~0.9 to 1.5 %/K (Milly and Dunne, 2016; Scheff and Frierson, 2014; Roderick et al., 2014; 2015).

### Processing of climate model output and NARR dataset

To carry out our lake area modeling (Equations 2 and 3), we use monthly average output from the North American Regional Reanalysis (NARR) (Mesinger et al., 2006), the Paleoclimate Model Intercomparison Project 3 (PMIP3) ensemble and the Pliocene Model Intercomparison Project (PlioMIP) ensemble (Braconnot et al., 2012; Haywood et al., 2011; 2013). PlioMIP conducted two distinct simulations; we choose to use Experiment 2, which is the full ocean-atmosphere climate model simulations of the mid-Pliocene (*cf.* Haywood et al., 2013), making them more directly comparable to the LGM model output from PMIP3. We only use the archived energy and precipitation fields for forward modeling lake area distributions (Equation 2), and follow Roderick et al. (2014) by also using evapotranspiration (ET) fields to derive estimates of the regional  $\omega$  parameters used in the Budyko equation (Equation 3). The models used in this study (Table DR4) are a subset of the PMIP3 and PlioMIP ensembles that included all of the necessary surface energy and water flux variables necessary to carry out our calculations. Because of different model resolutions we re-grid all model data prior to further analysis using the ‘fields’ package in R (Nycha et al. 2016).

We use the methods outlined by Roderick et al. (2014) and process the NARR and climate model output by calculating the annual sum of potential evapotranspiration ( $E_p$ ) as the liquid water equivalent of the net irradiance (Equation 4 in main text). Further, annually summed precipitation (P) and evapotranspiration were tabulated from monthly averages. We use all of the land-grid cells where ET does not exceed P annually to fit the Budyko relationship (Equation 3 in main text) using the ‘nls2’ package in R (Grothendieck, 2013). The derived  $\omega$  values are reported in Table DR5. The median change in  $E_p/P$  vs.  $ET/P$  for all grid cells in the domain for each model is shown in Figure DR2 with the mean  $\omega$  value over all models contoured. We plot the median change of  $E_p/P$  vs.  $ET/P$ , rather than mean changes, for each individual model because the spatial distributions of  $E_p$ , P and ET are skewed in the modeling domain of interest. To avoid potential biases in absolute precipitation amount simulated by different models, we plot the anomaly relative to the pre-industrial control simulation in the predicted lake surface area

change in Figure 2B rather than the absolute value. Further, since our objective is to model trends and lake area distributions, we determine  $E_L$  using the Priestley-Taylor equation (Priestley, 1959; Priestley and Taylor, 1972; Sumner and Jacobs, 2005):

$$LE = \alpha \frac{\Delta}{\Delta + \gamma} R_N \quad (\text{DR1})$$

where  $LE$  is the latent heat flux that is related to lake evaporation ( $E_L$  in equation 3 in the main text) by the latent heat of vaporization,  $\alpha=1.25$  is an empirically determined dimensionless correction,  $\Delta$  is the slope of the saturation vapor-pressure curve, which is temperature dependent,  $\gamma$  is the psychrometric constant, which is elevation dependent, and  $R_N$  is the net downward radiation at the surface (see equation 4). Use of more complex evaporation equations would require additional parameters that are difficult to estimate or measure in the past (e.g., Linacre, 1977).

To carry out the NARR sensitivity analyses (Figure 2A, 2C, 2D and DR3), we scale precipitation linearly using a scaling factor as described in the main text. Temperature is scaled linearly to scale  $R_N$  (equation 4) by 1.6%/K (see previous section). Further, because we use the Priestley-Taylor equation (Priestley, 1959; Priestley and Taylor, 1972; Sumner and Jacobs, 2005) to approximate lake evaporation ( $E_L$  in equation 2 in the main text) changes in temperature change the slope ( $\Delta$ ) of the saturation vapor-pressure curve. For the NARR sensitivity analyses, we use the US catchment median value of  $\omega = 2.6$  (Greve et al., 2015). If we were to use a lower  $\omega$  value (see for example PMIP3/PlioMIP control simulations in Table DR5), as suggested by maps of modern catchment derived  $\omega$  values in Greve et al. (2015), the effect of decreasing evaporative demand on increasing LGM lake levels would be greater, suggesting lower precipitation scaling factors (Figure 2C and 2D). Conversely, the increase in precipitation needed to drive Pliocene lake areas would be lower, but greater than pre-industrial. However, a majority of the models suggest a decrease in  $\omega$  for the LGM but not the Pliocene (Table DR5).

## Dataset Treatment

**LGM Normalized Lake Areas.** LGM lake areas were compiled from the tables and maps of the sources listed in Table DR1 (Allen, 2005; Reheis, 1999; Orme, 2008; Grayson, 2011; *Natural Earth* database; Soller et al., 2009; Williams and Bedinger, 1984; Mifflin and Wheat, 1979). We assume no major watershed boundary and basin configuration changes since the LGM. We paired the lake areas in ArcGIS 10.0 with the LGM lake areas with modern watershed boundaries from the *HydroSHEDS*, *HydroBASINS*, and *HydroLAKES* (Lehner et al., 2008; Lehner and Grill, 2013; Messenger et al., 2016) databases (<http://www.hydrosheds.org/>). Further assumptions were:

- Average normalized areas were calculated across all available estimates (rightmost column of Table DR1).
- For Figure DR3 northern Great Basin lakes ( $> 39^\circ\text{N}$ ) areas were reduced by 50%, based on work from smaller lakes such as Lake Surprise (Ibarra et al., 2014), Lake Franklin (Munroe and Laabs, 2013), and a review by Reheis et al. (2014).

**Mid-Pliocene Normalized Lake Areas.** Lake areas were only derived from the compilation in Pound et al. (2014). We only paired lakes in the compilation from Pound et al. (2014) to modern drainage basins (Table DR3) if the following criteria were met:

- It was clear that the lake was terminal based on the lacustrine sedimentology, topography and drainage network (cf. Table 2 in Pound et al. (2014)).
- The lake area did not span multiple modern watersheds over large drainage divides nor did it appear to be influenced by large tectonic drainage reconfigurations (cf. Adam et al., 1990; Thompson, 1992; Reheis et al., 2002; Knott et al., 2008; Phillips, 2008; Pound et al., 2014).

Given that extension in the Basin and Range has been ongoing since the Miocene (e.g., Colgan et al., 2006), it is likely that the many terminal basins created by Basin and Range faulting were filled by lakes during wet intervals such as the mid-Pliocene. Since the Pound et al. (2014) dataset is primarily derived from basinal sedimentary deposits, which may have undergone unquantifiable erosion or burial since Pliocene deposition the  $A_L/A_B$  calculations may be underestimates which would necessitate even larger increases in precipitation relative to present day during the mid-Pliocene. However, if additional extension has occurred since the Pliocene these estimates may be overestimates. Examples of lakes in Table DR 3 from the Pound et al. (2014) compilation for which normalized lake areas were not calculated include Tule Lake (Adam et al., 1990), which has evidence for a sill indicating that the lake overflowed into the Klamath River basin (cf. Figure 1 of Adam et al., (1990)), and Glenn's Ferry (Smith, 1981; Thompson, 1992), due to possible drainage to the southwest (Thompson, 1992).

*Macrostrat* lacustrine data are only used as supporting evidence plotted on Figure 1B. The *Macrostrat* database does not provide individual lakes, rather the database contains aggregates of stratigraphic datasets grouped into polygons of differing areas. However, given the relatively high resolution of the *Macrostrat* polygons the distribution of mid-Pliocene lacustrine sediments suggests that many areas of modern terminally draining basins had lakes during the mid-Pliocene (Fig. 1B).

The calculation of lake area,  $A_L$  represents the maximum expansion of lakes in a given basin during the time intervals of interest. A complication for both the LGM and mid-Pliocene lake areas is the "Manly Group", which contain multiple higher elevation fill and spill sub-basins that eventually flowed to Lake Manly (Death Valley). For ease of analysis we choose to group these sub-basins into one large terminal basin (see Table DR1 and DR3) although this treatment may result in an underestimate in  $A_L/A_B$ . Similarly, Lake Lahontan and Lake Bonneville integrated multiple sub-basins but were fully connected at their highstand elevations (Reheis et al., 2014). As such, we combined areas for all sub-basins in the Lahontan and Bonneville watersheds in Table DR1.

**Temperature Estimates.** Independent estimates of temperature changes (relative to modern) (x-axis of Figures 2C, 2D and DR3) are as follows:

- Figure 2C we plot the full range of temperature estimates for the LGM (-13 to -2.75 °C (median = -7.5°C) based on tables in: Matsubara and Howard, 2008; Grayson, 2011).
- In Figure 2D depressions are observed to be less depressed in this region than further inland. Thus, we plot a reduced range of temperature estimates for the LGM (-10 to -2.75 °C based on tables in: Matsubara and Howard, 2008; Grayson, 2011).
- For Figures 2C and 2D we plot the full range of temperature estimates for the mid-Pliocene (0 to +6 °C based on tables in: Dowsett et al., 1994; Molnar and Cane, 2007)

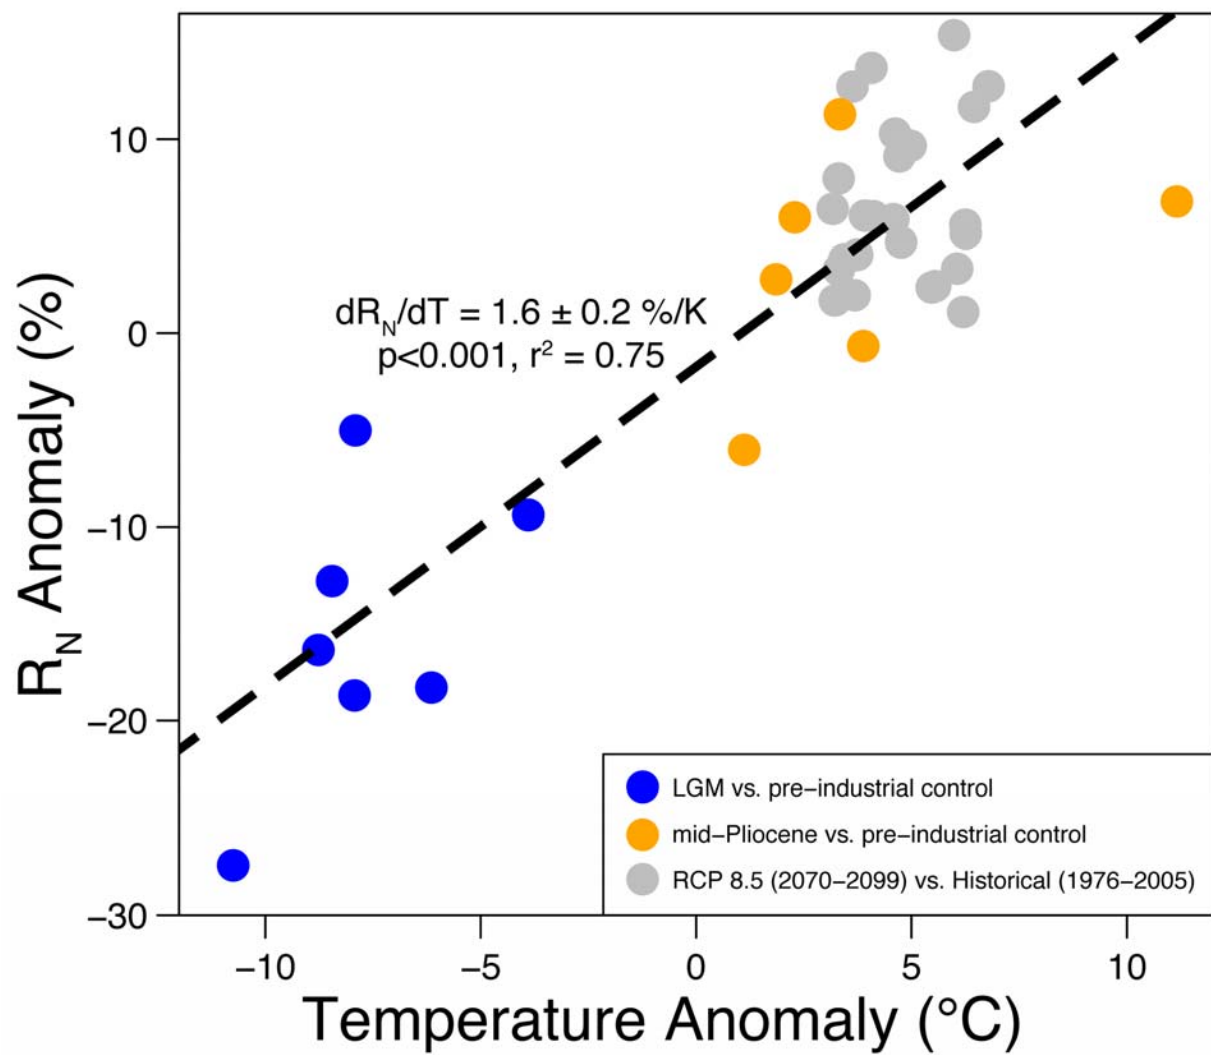

**Figure DR1.** Empirical scaling of potential evapotranspiration with surface temperature based on PMIP3, PlioMIP and CMIP5 simulations (see DR text above).

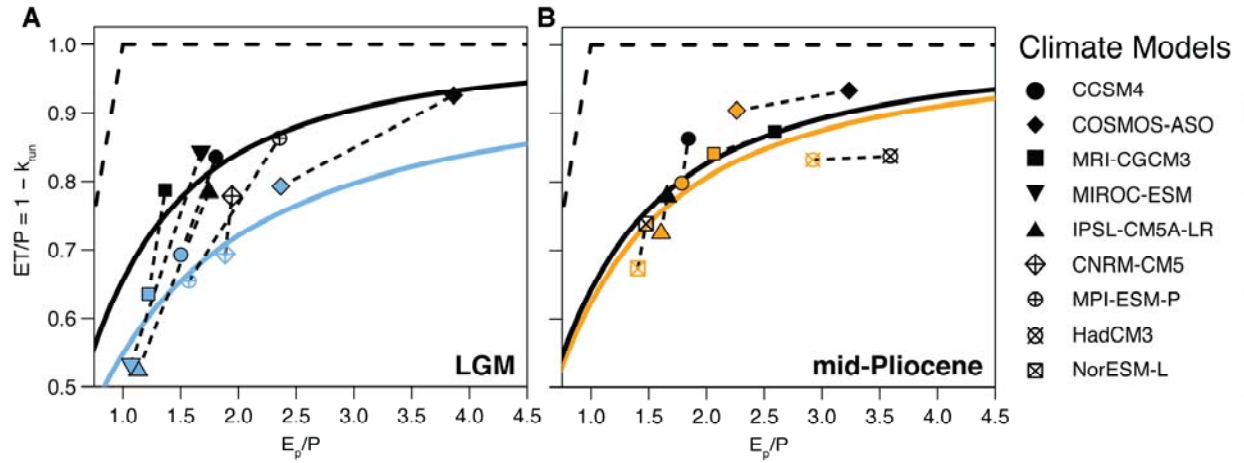

**Figure DR2. A:** Budyko framework – median changes in  $E_p/P$  vs.  $ET/P$  calculated from LGM climate model simulations. Dashed lines connect simulations from the same models. Colored curves and symbols are the LGM simulations. Solid lines are the ensemble averages (Table DR5). See climate model processing methods for more details. **B:** Same as A for mid-Pliocene simulations.

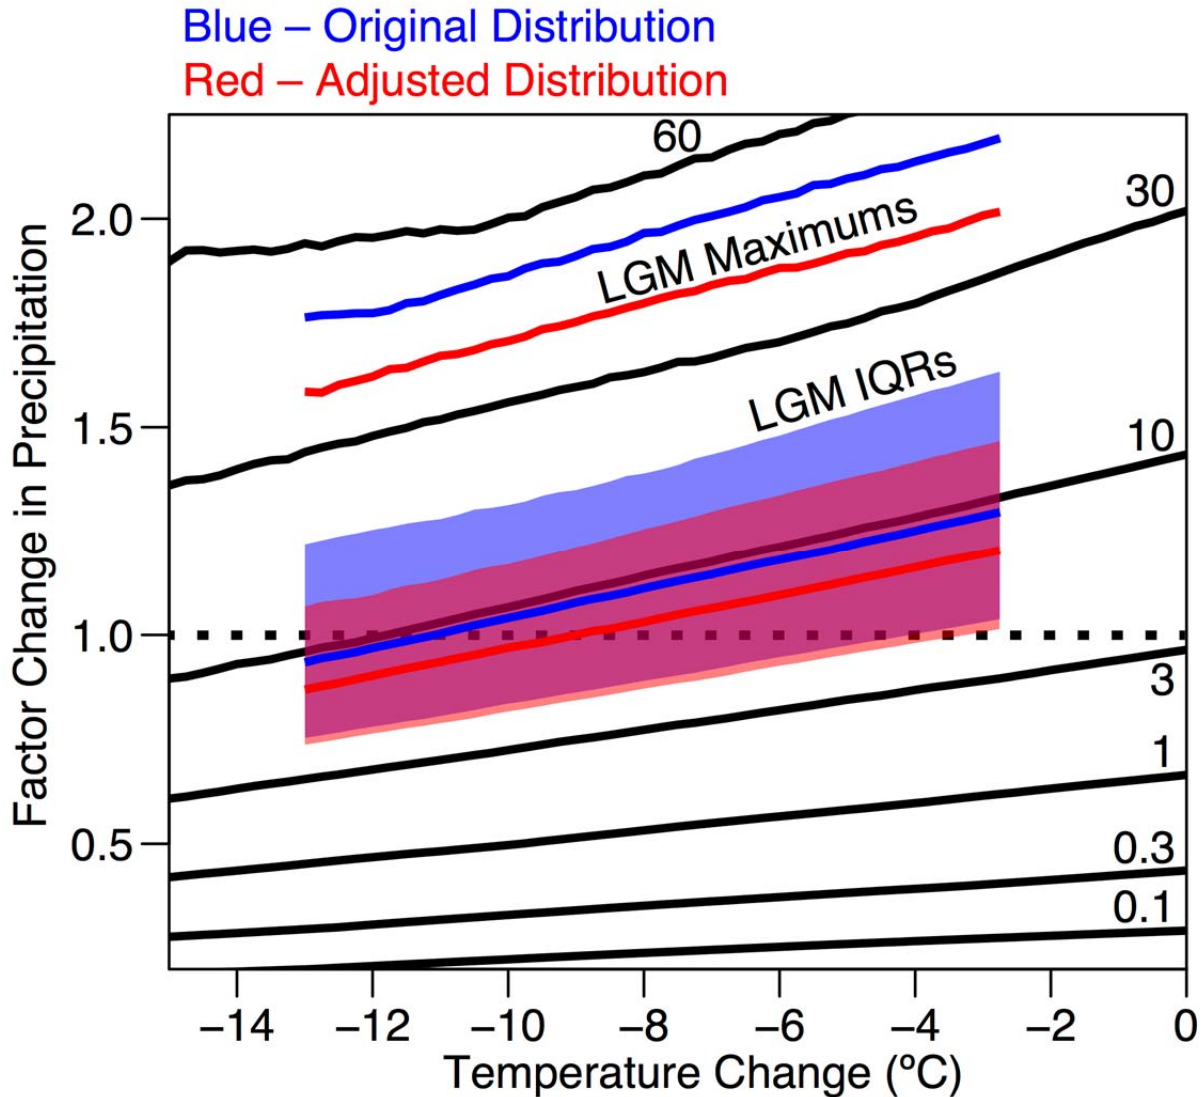

**Figure DR3.** Effect of adjusting northern Great Basin lake areas. Median calculated lake level from NARR data (black lines) and original LGM distributions (blue shading and lines) are the same as Figure 2C. Shown in red is the adjusted distribution of LGM lake areas (see Table DR1) assuming ~50% smaller lakes in the northern Great Basin (lakes north of 39 °N). Many lakes in the northern Great Basin stood at prominent but lower stillstands during the LGM than the post-LGM highstands (Munroe and Laabs, 2013; Ibarra et al., 2014; Reheis et al., 2014). As in Figure 2B we plot the full range of temperature estimates for the LGM (-13 to -2.75 °C (median = -7.5°C) based on tables in: Matsubara and Howard, 2008; Grayson, 2011).

### Links to online databases for geospatial and climate data used for this study

- *HydroSHEDS/HydroBASINS/HydroLAKES* (Lehner et al., 2008; Lehner and Grill, 2013; Messenger et al., 2016): <http://www.hydrosheds.org/>
- *Natural Earth* pluvial lakes database: <http://www.naturalearthdata.com/downloads/10m-physical-vectors/10m-lakes/>
- *Macrostrat* database: <https://macrostrat.org/>
- “Extent of Pleistocene Lakes in the Western Great Basin”, by Reheis (1999): <https://geonnsdi.er.usgs.gov/metadata/map-mf/2323/metadata.faq.html>
- “Map Database for Surficial Materials in the Conterminous United States”, by Soller et al. (2009): <https://pubs.usgs.gov/ds/425/>
- NCEP North American Regional Reanalysis (NARR): <https://www.esrl.noaa.gov/psd/data/gridded/data.narr.html>
- Paleoclimate Modelling Intercomparison Project 3 (PMIP3): <https://pmip3.lsce.ipsl.fr/>
- PlioMIP1 output was distributed by Alan Haywood, Aislin Dolan, Daniel Hill and Steven Pickering (personal communication, 2016)



**Table DR1 – Compilation of late Pleistocene (~LGM) lake areas and modern watershed areas.** All areas are in km<sup>2</sup>. References: (1) *HydroSHEDS/HydroBASINS/HydroLAKES* (Lehner et al., 2008; Lehner and Grill, 2013; Messenger et al., 2016), (2) Allen (2005), (3) Reheis (1999), (4) Orme (2008), (5) Grayson (2011), (6) *Natural Earth* database, (7) Soller et al. (2009), (8) Williams and Bedinger (1984), (9) Mifflin and Wheat (1979). Average normalized areas are calculated using the *HydroBASINS* (Lehner and Grill, 2013) basin areas and stream networks with all available lake area estimates (columns 2b, 3a, 4-9). Agreement of lake areas between publications is <5% for most basins. Allen (2005) basin areas (column 2a) are for comparison only. Reheis (1999) maximum lake areas (column 3b) are not used as they represent post-LGM highstand areas or pre-MIS 2 highstands. Latitude and longitude values are for reference only and correspond to the centroid for each terminal basin. Soller et al. (2009), Reheis (1999) and the *Natural Earth* pluvial lakes database are mapped in Figure 1A. Adjusted normalized distributions (shown used in Figure DR3) assumes that LGM lake areas were ~50% maximum highstands for watersheds north of 39 °N (polygon centroid's location) to account for post-LGM highstands observed in the northern Great Basin (Munroe and Laabs, 2013; Ibarra et al., 2014; Reheis et al., 2014). Unnamed basins were assigned numbers: UN-GB# – Unnamed-Great Basin; UN-SW# – Unnamed-Southwest.

| Lake Name     | Latitude | Longitude | Basin Area (1) | Basin Area (2a) | Lake Area (2b) | Lake Area (3a) | Maximum Lake Area (3b) | Lake Area (4) | Lake Area (5) | Lake Area (6) | Lake Area (7) | Lake Area (8) | Lake Area (9) | Average Normalized Area (%) |
|---------------|----------|-----------|----------------|-----------------|----------------|----------------|------------------------|---------------|---------------|---------------|---------------|---------------|---------------|-----------------------------|
| Acme          | 38.55    | -118.32   | 351.45         |                 |                |                |                        |               |               | 7.40          |               |               |               | 2.10                        |
| Alford        | 42.18    | -118.68   | 7031.36        |                 |                | 1153.62        |                        | 1270.00       | 1269.10       | 947.19        |               | 1217.30       |               | 16.66                       |
| Alkali        | 43.04    | -120.06   | 1375.20        |                 |                |                |                        | 550.00        | 590.52        | 565.90        |               |               |               | 41.36                       |
| Animas        | 32.29    | -108.85   | 5607.00        | 5670.00         | 374.00         |                |                        |               |               |               | 313.38        |               |               | 5.59                        |
| Antelope      | 39.85    | -114.31   | 874.68         |                 |                | 140.15         |                        |               | 124.32        | 127.12        |               | 124.32        | 124.32        | 14.64                       |
| Bonneville    | 40.18    | -112.67   | 134131.13      |                 |                |                |                        | 51700.00      | 51864.55      | 51956.71      |               | 51644.40      | 51644.40      | 38.59                       |
| Bonnie Claire | 37.33    | -117.11   | 3526.21        |                 |                |                |                        |               |               | 142.63        |               |               |               | 4.04                        |
| Bristol       | 37.96    | -114.76   | 2334.47        |                 |                |                |                        |               | 90.65         | 77.33         |               | 90.65         |               | 3.69                        |
| Buffalo       | 40.50    | -117.32   | 1284.38        |                 |                | 66.55          |                        |               | 199.43        | 195.25        |               | 199.43        |               | 12.86                       |
| Cactus Flat   | 38.13    | -116.80   | 6100.73        |                 |                |                |                        | 344.47        |               | 374.97        |               |               |               | 5.90                        |
| Cahuilla      | 33.00    | -115.80   | 20050.8        |                 |                |                |                        |               |               |               |               | 7769.97       |               | 38.75                       |
| Carpenter     | 38.51    | -114.57   | 1432.29        |                 |                | 121.93         |                        |               | 347.06        | 358.10        |               | 347.06        | 347.06        | 21.24                       |
| Catlow        | 42.52    | -119.20   | 4850.63        |                 |                |                |                        | 900.00        | 898.73        | 905.54        |               | 1152.55       |               | 19.88                       |
| Cave          | 38.57    | -114.85   | 930.13         |                 |                | 121.29         |                        |               | 178.71        | 180.27        |               | 178.71        | 178.71        | 18.01                       |
| Cedar         | 37.62    | -113.17   | 374.57         |                 |                |                |                        |               |               | 18.55         |               |               |               | 4.95                        |
| Chewaucan     | 42.68    | -120.51   | 3385.35        |                 |                |                |                        | 1200.00       | 1243.20       | 1194.08       |               | 1243.20       |               | 36.04                       |
| Chochise      | 32.15    | -109.84   | 4357.00        |                 |                |                |                        |               |               |               | 545.79        | 621.60        |               | 13.40                       |
| Clayton       | 37.71    | -117.60   | 1437.76        |                 |                |                |                        |               |               | 85.14         |               |               |               | 5.92                        |
| Clover        | 40.85    | -114.83   | 2665.56        |                 |                | 743.21         | 1094.25                | 890.00        | 890.96        | 913.81        |               | 911.68        | 911.68        | 32.90                       |
| Cloverdale    | 31.36    | -108.85   | 467.80         | 460.00          | 102.00         |                |                        |               |               |               | 82.52         | 77.70         |               | 17.12                       |
| Coal          | 38.00    | -115.41   | 2487.57        |                 |                |                |                        |               | 178.71        | 188.33        |               | 178.71        | 178.71        | 7.28                        |
| Colombus      | 37.79    | -118.00   | 3532.12        |                 |                | 141.45         |                        |               | 139.86        | 365.10        |               | 204.61        | 204.61        | 5.98                        |
| Coyote        | 42.38    | -118.19   | 1789.45        |                 |                | 317.39         |                        |               |               | 125.90        |               |               |               | 12.39                       |
| Cuddeback     | 35.31    | -117.47   | 555.31         |                 |                |                |                        |               |               |               |               | 90.65         |               | 16.32                       |
| Deep Spring   | 37.36    | -118.08   | 519.42         |                 |                |                |                        |               | 44.03         | 25.33         |               | 44.03         |               | 7.28                        |
| Delamar       | 37.44    | -114.87   | 926.74         |                 |                |                |                        |               |               | 26.49         |               |               |               | 2.86                        |
| Desatoya      | 39.29    | -117.57   | 1490.65        |                 |                | 397.51         |                        |               | 435.12        | 442.13        |               | 435.12        | 435.12        | 28.78                       |
| Diamond       | 39.40    | -116.38   | 8018.15        |                 |                | 1021.21        | 2283.22                | 760.00        | 758.87        | 1023.04       |               | 1015.28       |               | 11.42                       |
| Dixie         | 39.80    | -117.84   | 5410.24        |                 |                | 798.63         | 2394.69                | 1090.00       | 1090.39       | 721.47        |               | 714.84        | 766.64        | 15.96                       |
| Eagle         | 40.64    | -120.89   | 1123.78        |                 |                | 126.84         |                        |               | 160.58        | 145.49        |               |               |               | 12.84                       |
| Edwards       | 39.58    | -117.69   | 1078.89        |                 |                | 287.10         |                        |               | 264.18        | 266.36        |               | 264.18        | 264.18        | 24.95                       |
| Encino        | 34.60    | -105.60   | 644.20         | 620.00          | 96.00          |                |                        |               |               |               | 56.77         | 310.80        |               | 28.53                       |
| Estancia      | 34.67    | -105.96   | 5733.70        | 5050.00         | 1125.00        |                |                        |               |               |               | 1084.76       | 2330.99       |               | 29.79                       |
| Fort Rock     | 43.28    | -120.89   | 6403.89        |                 |                |                |                        |               | 1945.08       | 1564.66       |               | 2343.94       |               | 30.47                       |

|                 |       |         |           |          |        |          |          |          |          |          |        |          |          |       |
|-----------------|-------|---------|-----------|----------|--------|----------|----------|----------|----------|----------|--------|----------|----------|-------|
| Franklin        | 40.37 | -115.23 | 3345.89   |          |        | 947.49   |          | 1220.00  | 1219.89  | 1248.19  |        | 1250.97  | 1250.97  | 35.55 |
| Fred            | 39.77 | -119.82 | 47.73     |          |        |          |          |          |          | 7.90     |        |          |          | 16.56 |
| Frenchman       | 36.85 | -115.96 | 1180.75   |          |        |          |          |          |          | 20.05    |        |          |          | 1.70  |
| Gabbs           | 38.85 | -118.09 | 3319.81   |          |        |          |          |          |          | 312.43   |        |          |          | 9.41  |
| Gale            | 39.83 | -115.09 | 1912.71   |          |        | 168.82   |          |          | 411.81   | 431.64   |        | 411.81   |          | 18.61 |
| Garfield        | 38.36 | -118.32 | 246.58    |          |        |          |          |          | 7.77     | 17.47    |        | 7.77     | 8.55     | 4.21  |
| Gilbert         | 39.84 | -116.71 | 1540.94   |          |        | 392.61   |          | 540.00   | 538.72   | 398.62   |        | 401.45   |          | 29.48 |
| Gold Flat       | 37.50 | -116.50 | 1791.85   |          |        |          |          |          | 67.34    | 66.76    |        | 67.34    | 67.34    | 3.75  |
| Goldfield       | 37.85 | -117.29 | 826.72    |          |        |          |          |          |          | 17.75    |        |          |          | 2.15  |
| Goodsight       | 32.50 | -107.33 | 532.20    | 590.00   | 65.00  |          |          |          |          |          |        | 38.85    |          | 7.30  |
| Granite Springs | 40.25 | -118.89 | 2518.64   |          |        |          |          |          | 103.60   | 109.41   |        | 103.60   | 103.60   | 4.17  |
| Groom           | 37.31 | -115.86 | 1717.34   |          |        |          |          |          | 93.24    | 74.32    |        | 93.24    |          | 5.06  |
| Groom           | 37.23 | -115.41 | 2575.13   |          |        |          |          |          |          | 133.60   |        | 93.24    |          | 4.40  |
| Guano           | 42.00 | -119.48 | 2124.41   |          |        |          |          |          |          | 172.02   |        |          |          | 8.10  |
| Harper          | 35.06 | -117.33 | 1871.58   |          |        |          |          |          |          |          |        | 139.86   |          | 7.47  |
| High Rock       | 42.02 | -119.16 | 194.06    |          |        |          |          |          |          | 13.95    |        | 31.08    |          | 11.60 |
| Hubbs           | 39.76 | -115.37 | 1666.22   |          |        | 532.16   | 619.98   | 530.00   | 530.95   | 521.93   |        | 505.05   | 505.05   | 31.26 |
| Huntoon         | 38.11 | -118.58 | 318.05    |          |        |          |          |          |          | 5.39     |        |          |          | 1.69  |
| Indian Springs  | 36.68 | -115.73 | 1719.03   |          |        |          |          |          |          | 168.33   |        |          |          | 9.79  |
| Jakes           | 39.30 | -115.27 | 1102.26   |          |        | 213.14   |          |          | 163.17   | 155.12   |        | 163.17   | 163.17   | 15.56 |
| Kawich          | 37.49 | -116.22 | 947.41    |          |        |          |          |          | 56.98    | 49.12    |        | 56.98    | 56.98    | 5.81  |
| Kumiva          | 40.43 | -119.12 | 853.07    |          |        |          |          |          | 38.85    | 45.10    |        | 38.85    | 38.85    | 4.74  |
| Labou           | 39.23 | -118.27 | 790.86    |          |        | 35.64    |          |          | 51.80    | 50.69    |        | 51.80    | 51.80    | 6.11  |
| Lahontan        | 40.36 | -118.09 | 105613.36 |          |        | 21906.48 | 30917.97 | 22300.00 | 22004.56 | 23368.63 |        | 21859.52 | 23478.78 | 21.29 |
| Laughton        | 39.68 | -119.97 | 81.36     |          |        |          |          |          | 18.13    | 10.87    |        | 18.13    |          | 19.31 |
| Lemmon          | 39.67 | -119.87 | 247.58    |          |        |          |          |          | 33.67    | 37.94    |        | 33.67    | 33.67    | 14.03 |
| Little Fish     | 38.84 | -116.42 | 1055.41   |          |        |          |          |          |          | 12.67    |        |          |          | 1.20  |
| Lunar Crater    | 38.66 | -115.98 | 1291.56   |          |        |          |          |          |          | 16.17    |        |          |          | 1.25  |
| Luning          | 38.46 | -118.10 | 637.12    |          |        |          |          |          |          | 30.56    |        |          |          | 4.80  |
| Macy            | 41.97 | -119.66 | 76.41     |          |        |          |          |          |          | 20.35    |        | 23.31    |          | 28.57 |
| Madeline        | 40.89 | -120.38 | 2167.64   |          |        |          |          | 780.00   | 777.00   | 763.23   |        | 777.00   |          | 35.72 |
| Malheur         | 43.44 | -119.11 | 13083.89  |          |        |          |          | 2380.00  | 2380.20  | 2432.95  |        | 2460.49  |          | 18.45 |
| Manly Group     | 36.20 | -117.16 | 51541.38  |          |        |          |          |          | 4169.88  | 5004.85  |        |          |          | 8.90  |
| Maxey           | 38.76 | -114.42 | 1370.13   |          |        | 210.87   |          |          | 209.79   | 211.83   |        | 209.79   | 209.79   | 15.36 |
| Meinzer         | 41.59 | -119.73 | 1870.75   |          |        | 923.61   |          | 920.00   | 919.45   | 992.93   |        | 890.96   | 890.96   | 49.34 |
| Monte Cristo    | 38.34 | -117.80 | 720.59    |          |        |          |          |          |          | 14.26    |        |          |          | 1.98  |
| Mormon          | 36.84 | -115.40 | 973.54    |          |        |          |          |          |          | 70.35    |        |          |          | 7.23  |
| Newark          | 39.38 | -115.82 | 3604.16   |          |        | 816.84   | 986.44   | 930.00   | 795.13   | 805.90   |        | 782.18   | 782.18   | 22.72 |
| Otero           | 32.86 | -106.36 | 9556.70   | 12600.00 | 745.00 |          |          |          |          |          | 409.94 | 466.20   |          | 4.58  |
| Pahrump         | 36.05 | -115.81 | 3748.99   |          |        |          |          |          |          | 657.73   |        |          |          | 17.54 |
| Papoose         | 37.08 | -115.81 | 256.83    |          |        |          |          |          |          | 27.20    |        |          |          | 10.59 |
| Penoyer         | 37.74 | -115.79 | 1819.15   |          |        |          |          |          |          | 59.39    |        |          |          | 3.26  |
| Pine            | 38.45 | -113.74 | 1898.09   |          |        |          | 922.41   |          | 106.19   | 116.43   |        |          |          | 5.86  |
| Pinos Wells     | 34.46 | -105.60 | 589.90    | 560.00   | 82.00  |          |          |          |          |          | 49.11  | 207.20   |          | 21.72 |
| Playas          | 31.86 | -108.57 | 1135.60   | 1120.00  | 49.00  |          |          |          |          |          | 16.72  | 259.00   |          | 12.14 |
| Railroad        | 38.65 | -115.67 | 5518.75   |          |        | 864.43   |          | 1360.00  | 1359.74  | 980.86   |        | 971.25   | 971.25   | 19.65 |
| Reveille        | 38.22 | -116.22 | 4346.40   |          |        | 146.20   |          |          | 106.19   | 103.75   |        | 106.19   | 106.19   | 2.62  |
| Rhodes          | 38.25 | -118.11 | 520.42    |          |        |          |          |          | 33.67    | 29.66    |        | 33.67    | 33.67    | 6.28  |
| Sacramento      | 32.46 | -105.66 | 1397.40   | 780.00   | 86.00  |          |          |          |          |          |        |          |          | 6.15  |
| Saline          | 36.78 | -117.78 | 1928.51   |          |        |          |          |          |          | 83.93    |        |          |          | 4.35  |
| San Agustin     | 33.85 | -108.15 | 3046.90   | 3880.00  | 786.00 |          |          |          |          |          | 513.47 | 1129.24  |          | 26.96 |



**Table DR2 –Area of modern lakes (>1km<sup>2</sup>) found in terminal watersheds.** Data derived from the HydroSHEDS/HydroLAKES/HydroBASINS database (Lehner et al., 2008; Lehner and Grill, 2013; Messenger et al., 2016) intended to represent maximum possible sizes by including seasonal playa lakes.

| Lake Name   | Basin Area | Total Lake Area                  | Normalized Area (%) | Notes                                                                                                                                       |
|-------------|------------|----------------------------------|---------------------|---------------------------------------------------------------------------------------------------------------------------------------------|
| Alkali      | 1375.20    | 14.97                            | 1.09                | 3 unnamed seasonal playa lakes                                                                                                              |
| Alvord      | 7031.36    | 5.49                             | 0.08                | Seasonal playa lake                                                                                                                         |
| Bonneville  | 134131.13  | 8923.51                          | 6.65                | Maximum size: Great Salt Lake, Bonneville Salt Flats, Bear Lake and other playa lakes                                                       |
| Chewaucan   | 3385.35    | 285.86                           | 8.44                | Lake Abert and Summer Lake                                                                                                                  |
| Clover      | 2665.56    | 5.13                             | 0.19                | Playa Lake                                                                                                                                  |
| Fort Rock   | 6403.89    | 8.24                             | 0.13                | Seasonal playa Lake                                                                                                                         |
| Franklin    | 3345.89    | 13.17                            | 0.39                | 3 playa/marsh lakes                                                                                                                         |
| Lahontan    | 105613.36  | 954.70                           | 0.90                | Pyramid and Walker Lakes (historic areas) plus playa lakes                                                                                  |
| Malheur     | 13083.89   | 422.28                           | 3.23                | 2 playa lakes                                                                                                                               |
| Manly Group | 51541.38   | 238.52                           | 0.46                | Includes area of Mono Lake (Pleistocene Lake Russell) and seasonal playa lakes in all following sub-basins: Owens, Searles, Panamint, Manly |
| Meinzer     | 1870.75    | 56.33                            | 3.01                | Numerous small seasonal playa lakes                                                                                                         |
| Spring      | 2949.98    | 4.07                             | 0.14                | Playa lake                                                                                                                                  |
| Surprise    | 3840.91    | 255.13                           | 6.64                | 3 seasonal playa lakes                                                                                                                      |
| Warner      | 4804.82    | 130.15                           | 2.71                | Numerous small seasonal playa lakes                                                                                                         |
|             |            | Area Normalized (%) Distribution |                     |                                                                                                                                             |
|             |            | Median                           | 1.00                |                                                                                                                                             |
|             |            | IQR1                             | 0.24                |                                                                                                                                             |
|             |            | IQR3                             | 3.17                |                                                                                                                                             |
|             |            | Max                              | 8.44                |                                                                                                                                             |

**Table DR3 – Compilation of mid-Pliocene (early Piacenzian, ~2.9 to 3.3 Ma) lake deposits.** P2014 – Pound et al. (2014). We consider all continuous formations that span the Piacenzian in *Macrostrat*. Pliocene lake areas are only paired to basin areas when it is clear that the lake was terminal, does not span multiple modern watersheds over large drainage divides, and have not been greatly influenced by tectonic drainage reconfiguration.

| Name of Lake/Formation          | Latitude | Longitude | Reference  | Age minimum (Ma) | Age maximum (ma)   | Thickness (m)                           | Unit ID             | Section ID       |                  |
|---------------------------------|----------|-----------|------------|------------------|--------------------|-----------------------------------------|---------------------|------------------|------------------|
| Palouse Loess                   | 46.56    | -117.2    | Macrostrat | 0                | 3.3                | 100                                     | 7460                | 1968             |                  |
|                                 | 36.42    | -115.43   | Macrostrat | 0                | 5.3                | 10                                      | 14059               | 3727             |                  |
|                                 | 38.08    | -113.78   | Macrostrat | 0                | 17.1               | 1000                                    | 14212               | 3774             |                  |
| Santa Fe Gp                     | 35.46    | -106.08   | Macrostrat | 0                | 14.4               | 1000                                    | 14906               | 3965             |                  |
| Paso Robles Fm                  | 35.39    | -120.29   | Macrostrat | 0                | 5.3                | 200                                     | 17724               | 4603             |                  |
| Santa Fe Gp                     | 34.15    | -107.28   | Macrostrat | 0.7              | 4.9                | 470                                     | 2187                | 356              |                  |
| Santa Fe Gp                     | 33.81    | -106.8    | Macrostrat | 0.7              | 4.9                | 130                                     | 2214                | 362              |                  |
| Glenns Ferry Fm                 | 43.56    | -115.92   | Macrostrat | 0.7              | 5.8                | 300                                     | 7488                | 1975             |                  |
|                                 | 40.71    | -118.24   | Macrostrat | 0.7              | 4.9                | 300                                     | 13530               | 3584             |                  |
| Atherton Fm                     | 38.63    | -87.07    | Macrostrat | 1.5              | 5.1                | 50                                      | 11687               | 3158             |                  |
| Fort Hancock Fm                 | 31.91    | -106.5    | Macrostrat | 1.9              | 3.6                | 10                                      | 1889                | 292              |                  |
| Santa Fe Gp                     | 33.05    | -105.61   | Macrostrat | 1.9              | 19.3               | 10                                      | 2275                | 383              |                  |
| Paso Robles Fm                  | 35.46    | -120.68   | Macrostrat | 1.9              | 8.3                | 120                                     | 17735               | 4605             |                  |
| Paso Robles Fm                  | 36.48    | -121.74   | Macrostrat | 1.9              | 8.3                | 155                                     | 17753               | 4612             |                  |
| Blanco Fm                       | 33.73    | -99.98    | Macrostrat | 2.6              | 3.3                | 24                                      | 2575                | 469              |                  |
| Hungry Valley Fm                | 34.67    | -118.66   | Macrostrat | 2.6              | 4.9                | 2000                                    | 6314                | 1522             |                  |
| Palm Spring Fm                  | 33.57    | -115.85   | Macrostrat | 2.6              | 3.3                | 1500                                    | 6544                | 1598             |                  |
| Salt Lake Fm                    | 41.95    | -113.76   | Macrostrat | 2.6              | 8.7                | 800                                     | 14128               | 3752             |                  |
|                                 | 40.03    | -113.9    | Macrostrat | 2.6              | 17.1               | 1000                                    | 14210               | 3773             |                  |
| Salt Lake Fm                    | 41.71    | -111.59   | Macrostrat | 2.6              | 17.1               | 1000                                    | 14476               | 3839             |                  |
| Salt Lake Fm                    | 40       | -112.03   | Macrostrat | 2.6              | 10.5               | 1500                                    | 14565               | 3863             |                  |
|                                 | 40.55    | -112.3    | Macrostrat | 2.6              | 17.1               | 10                                      | 14626               | 3885             |                  |
| Salt Lake Fm                    | 40.98    | -111.62   | Macrostrat | 2.6              | 19.3               | 2000                                    | 14722               | 3909             |                  |
| Salt Lake Fm                    | 40.25    | -111.54   | Macrostrat | 2.6              | 17.1               | 4000                                    | 14727               | 3910             |                  |
| Bidahochi Fm                    | 35.95    | -109.91   | Macrostrat | 2.6              | 5.3                | 272                                     | 14987               | 3988             |                  |
| Bug Fm                          | 42.05    | -106.49   | Macrostrat | 2.6              | 4                  | 37                                      | 15759               | 4174             |                  |
| Tule Gp                         | 34.43    | -101.83   | Macrostrat | 2.8              | 2.9                | 10                                      | 2528                | 458              |                  |
| Gila Conglomerate               | 32.48    | -108.26   | Macrostrat | 2.8              | 4                  | 10                                      | 1855                | 271              |                  |
| Sunshine Ranch Mbr of Saugus Fm | 34.3     | -118.53   | Macrostrat | 2.8              | 3.1                | 915                                     | 6344                | 1529             |                  |
|                                 | 46.66    | -122.88   | Macrostrat | 2.8              | 13.3               | 350                                     | 7257                | 1896             |                  |
| Glenns Ferry Gp                 | 43.23    | -114.67   | Macrostrat | 2.8              | 8.3                | 300                                     | 13673               | 3622             |                  |
|                                 | 39.18    | -112.25   | Macrostrat | 2.8              | 12.2               | 1000                                    | 14570               | 3864             |                  |
| Thousand Creek Beds             | 41.46    | -119.04   | Macrostrat | 2.9              | 8.3                | 130                                     | 13454               | 3543             |                  |
|                                 |          |           |            |                  |                    |                                         |                     |                  |                  |
|                                 |          |           |            |                  |                    | Outcrop or Lake Area (km <sup>2</sup> ) | Normalized Area (%) | Age minimum (Ma) | Age maximum (ma) |
| Glenn's Ferry, ID               | 43.50    | -116.30   | P2014      |                  | Not terminal       | 22144                                   |                     | 2.4              | 3.8              |
| Tule Lake                       | 41.98    | -122.05   | P2014      |                  | Not terminal?      | 6291.45                                 |                     | 2.6              | 3                |
| Rhodes-Clayton-Fish Valleys, NV | 38.00    | -118.00   | P2014      |                  | Watershed unclear  | 10800                                   |                     | 2.6              | 3.4              |
| Owens Lake                      | 36.55    | -118.00   | P2014      |                  | Larger Manly Basin | 1500                                    |                     | 2                | 3                |
| Lake Manly                      | 36.55    | -117.05   | P2014      |                  | Larger Manly Basin | 1300                                    |                     | 2                | 3                |
| Panamint Lake                   | 35.95    | -117.20   | P2014      |                  | Larger Manly Basin | 276                                     |                     | 2                | 3                |
| China-Scarles Lake              | 35.55    | -117.40   | P2014      |                  | Larger Manly Basin | 800                                     |                     | 2                | 3                |
| Kochn Lake 1                    | 35.18    | -117.85   | P2014      |                  | Larger Manly Basin | 40                                      |                     | 2                | 3                |

|                                        |       |         |       |       |                                                              |        |       |     |     |
|----------------------------------------|-------|---------|-------|-------|--------------------------------------------------------------|--------|-------|-----|-----|
| Kochn Lake 2                           | 35.15 | -117.40 | P2014 |       | Larger Manly Basin                                           | 12.5   |       | 2   | 3   |
| Kochn Lake 3                           | 35.10 | -117.10 | P2014 |       | Larger Manly Basin                                           | 16     |       | 2   | 3   |
| Lake Russell                           | 38.00 | -119.00 | P2014 |       | Mono and Lake Russell listed separately by P2014             | 2800   |       | 2   | 2.8 |
| Mono Lake                              | 38.00 | -118.55 | P2014 |       | Mono and Lake Russell listed separately by P2014             | 1125   |       | 2   | 3   |
| All Manly Basin with Lake Russell Area |       |         | P2014 | 51541 |                                                              | 6744.5 | 13.09 |     |     |
| Harper 1                               | 34.65 | -118.00 | P2014 |       | Watershed unclear                                            | 25     |       | 2   | 3   |
| Harper 2                               | 34.65 | -117.90 | P2014 |       | Watershed unclear                                            | 4      |       | 2   | 3   |
| Harper 3                               | 34.70 | -117.80 | P2014 | 750   | Assumed separate from Harper 4                               | 60     | 8.00  | 2   | 3   |
| Harper 4                               | 34.45 | -117.50 | P2014 | 1027  | Assumed separate from Harper 3                               | 10     | 0.97  | 2   | 3   |
| South Mojave                           | 34.30 | -117.00 | P2014 | 11237 |                                                              | 4      | 0.04  | 2   | 3   |
| Lake Tecopa                            | 35.75 | -116.25 | P2014 | 14129 |                                                              | 112    | 0.79  | 2   | 3   |
| Lake Mojave                            | 35.05 | -116.10 | P2014 | 8219  | Assume that Mojave separate from Manly group during Pliocene | 120    | 1.46  | 2   | 3   |
| Lake Manix                             | 34.85 | -116.40 | P2014 | 1041  | Assume that Manix separate from Manly group during Pliocene  | 50     | 4.80  | 2   | 3   |
| Bristol Lake                           | 34.30 | -115.65 | P2014 | 1285  |                                                              | 84     | 6.54  | 2   | 3   |
| Cadiz Lake                             | 34.15 | -115.40 | P2014 | 967   |                                                              | 55     | 5.69  | 2   | 3   |
| Danby Lake                             | 34.05 | -115.15 | P2014 | 1120  |                                                              | 72     | 6.43  | 2   | 3   |
| Rita Blanca                            | 35.72 | -102.39 | P2014 | 1738  |                                                              | 54.39  | 3.13  | 3   | 3.6 |
| Hueco Bolson, TX                       | 30.90 | -105.30 | P2014 |       | Not terminal?                                                | 5780   |       | 1.8 | 4.8 |

| Normalized Area (%) Distribution |       |
|----------------------------------|-------|
| Median                           | 4.80  |
| Q1                               | 1.22  |
| Q3                               | 6.48  |
| Max                              | 13.09 |

**Table DR4 – Climate models used in this study.**

| <b>Model</b>                           | <b>Organization,<br/>Country</b>                                            | <b>Atmospheric<br/>Resolution<br/>(#lat x lon x levels)</b> | <b>References</b>                                    |
|----------------------------------------|-----------------------------------------------------------------------------|-------------------------------------------------------------|------------------------------------------------------|
| <b>PMIP3 LGM Ensemble</b>              |                                                                             |                                                             |                                                      |
| CNRM-CM5                               | CNRM-CERFACS,<br>France                                                     | 256x128 x L31                                               | Voldoire et al. (2013)                               |
| COSMOS-ASO                             | Freie Universität<br>Berlin, Germany                                        | 96x48 x L19                                                 | Zhou et al. (2014)                                   |
| CCSM4                                  | National Center for<br>Atmospheric<br>Research, USA                         | 288x192 x L26                                               | Gent et al. (2011);<br>Brady et al. (2013)           |
| MRI-CGCM3                              | Meteorological<br>Research Institute,<br>Japan                              | 320x160 x L48                                               | Yukimoto et al.<br>(2012)                            |
| IPSL-CM5A-L                            | Institute Pierre Simon<br>Laplace, France                                   | 96x95 x L39                                                 | Kageyama et al.<br>(2013); Dufresne et al.<br>(2013) |
| MPI-ESM-P                              | Max Planck Institute<br>for Meteorology,<br>Germany                         | 196x98 x L47                                                |                                                      |
| MIROC-ESM                              | Model for<br>Interdisciplinary<br>Research on Climate,<br>Japan             | 128x64 x L80                                                | Sueyoshi et al. (2013)                               |
| <b>PlioMIP (Experiment 2) Ensemble</b> |                                                                             |                                                             |                                                      |
| CCSM4                                  | National Center for<br>Atmospheric<br>Research, USA                         | 288x192 x L26                                               | Rosenbloom et al.<br>(2013)                          |
| MRI-CGCM 2.3                           | Meteorological<br>Research Institute and<br>University of<br>Tsukuba, Japan | 128x64 x L30                                                | Kamae and Ueda<br>(2012)                             |
| NorESM-L                               | Bjerknes Centre for<br>Climate Research,<br>Norway                          | 96x48 x L26                                                 | Zhang and Yan<br>(2012); Zhang et al.<br>(2012)      |
| HadCM3                                 | Hadley Centre for<br>Climate Prediction<br>and Research/Met<br>Office, UK   | 96x73 x L19                                                 | Bragg et al. (2012)                                  |
| IPSL-CM5A                              | Institute Pierre Simon<br>Laplace, France                                   | 96x95 x L39                                                 | Contoux et al. (2012)                                |
| COSMOS                                 | Alfred Wegener<br>Institute, Germany                                        | 96x48 x L19                                                 | Stepanek and<br>Lohmann (2012)                       |

**Table DR5 – Regional fitted Budyko parameters**

| <b>Model</b> | <b>LGM <math>\omega</math> value</b>      | <b>PI Control <math>\omega</math> value</b> |
|--------------|-------------------------------------------|---------------------------------------------|
| CNRM-CM5     | 1.82                                      | 2.08                                        |
| COSMOS-ASO   | 1.98                                      | 2.30                                        |
| CCSM4        | 1.98                                      | 2.44                                        |
| MRI-CGCM3    | 1.97                                      | 2.57                                        |
| IPSL-CM5A-L  | 1.69                                      | 2.21                                        |
| MPI-ESM-P    | 1.82                                      | 2.31                                        |
| MIROC-ESM    | 1.76                                      | 2.60                                        |
|              | <b>Pliocene <math>\omega</math> value</b> | <b>PI Control <math>\omega</math> value</b> |
| CCSM4        | 2.25                                      | 2.60                                        |
| MRI-CGCM 2.3 | 2.31                                      | 2.27                                        |
| NorESM-L     | 1.98                                      | 2.18                                        |
| HadCM3       | 1.99                                      | 1.90                                        |
| IPSL-CM5A    | 2.04                                      | 2.24                                        |
| COSMOS       | 2.64                                      | 2.51                                        |



## Data Repository References

- Adam, D.P., Bradbury, J.P., Rieck, H.J. and Sarna-Wojcicki, A.M., 1990, Environmental changes in the Tule Lake Basin, Siskiyou and Modoc Counties, California, from 3 to 2 Million years before present, USGS Bulletin 1933, 13 p.
- Allen, B.D., 2005, Ice age lakes in New Mexico: New Mexico's ice ages New Mexico Museum of Natural History and Science Bulletin, no. 28, p. 107-114.
- Braconnot, P., Harrison, S.P., Kageyama, M., Bartlein, P.J., Masson-Delmotte, V., Abe-Ouchi, A., Otto-Bliesner, B., and Zhao, Y., 2012, Evaluation of climate models using palaeoclimatic data: Nature Climate Change, v. 2, no. 6, p. 417-424.
- Brady, E.C., Otto Bliesner, B.L., Kay, J.E., and Rosenbloom, N., 2013, Sensitivity to Glacial Forcing in the CCSM4: Journal of Climate, v. 26, no. 6, p. 1901-1925.
- Bony, S., and Emanuel, K. A., 2001, A parameterization of the cloudiness associated with cumulus convection; evaluation using TOGA COARE data: Journal of the Atmospheric Sciences, v. 51, no. 21, p. 3158-3183
- Bragg, F.J., Lunt, D.J., and Haywood, A.M., 2012, Mid-Pliocene climate modelled using the UK Hadley Centre Model: PlioMIP Experiments 1 and 2: Geoscientific Model Development, v. 5, no. 5, p. 1109-1125.
- Colgan, J.P., Dumitru, T.A., McWilliams, M., Miller, E.L., 2006, Timing of Cenozoic volcanism and Basin and Range extension in northwestern Nevada: New constraints from the northern Pine Forest Range: Bulletin of the Geological Society of America, v. 118, no. 1-2, p. 126-139.
- Contoux, C., Ramstein, G., and Jost, A., 2012, Modelling the mid-Pliocene Warm Period climate with the IPSL coupled model and its atmospheric component LMDZ5A: Geoscientific Model Development, v. 5, no. 3, p. 903-917.
- Dufresne, J.L., Foujols, M.A., Denvil, S., Caubel, A., Marti, O., Aumont, O., Balkanski, Y., Bekki, S., Bellenger, H., Benshila, R., Bony, S., Bopp, L., Braconnot, P., Brockmann, P., et al., 2013, Climate change projections using the IPSL-CM5 Earth System Model: from CMIP3 to CMIP5: Climate dynamics, v. 40, no. 9-10, p. 2123-2165.
- Gent, P., Gent, P.R., Danabasoglu, G., Donner, L.J., Holland, M.M., Hunke, E.C., Jayne, S.R., Lawrence, D.M., Neale, R.B., Rasch, P.J., Vertenstein, M., Worley, P.H., Yang, Z.-L., and Zhang, M., 2011, The community climate system model version 4: Journal of Climate, v. 24, no. 19, p. 4973-4991.
- Gillespie, A., 2014, Land Surface Emissivity, in Njoku, E.G., ed., Encyclopedia of Remote Sensing: Springer Science+Business Media New York, v. XXV, p. 303-311
- Grayson, D., 2011, The Great Basin: a natural prehistory: University of California Press, 432 p.
- Haywood, A., Dowsett, H., and Otto-Bliesner, B., 2011, Pliocene Model Intercomparison Project (PlioMIP): experimental design and boundary conditions (experiment 2): Geoscientific Model Development, v. 4, p. 571-577.
- Haywood, A.M., Hill, D.J., Dolan, A.M., Otto-Bliesner, B.L., Bragg, F., Chan, W.-L., Chandler, M.A., Contoux, C., Dowsett, H.J., Jost, A., Kamae, Y., Lohmann, G., Lunt, D.J., Abe-Ouchi, A., Pickering, S.J., Ramstein, G., Rosenbloom, N.A., Salzmann, U., Sohl, L., Stepanek, C., Ueda, H., Yan, Q., and Zhang, Z., 2013, Large-scale features of Pliocene climate: results from the Pliocene Model Intercomparison Project: Climate of the Past, v. 9, p. 191-209.
- Ibarra, D.E., Egger, A.E., Weaver, K.L., Harris, C.R., and Maher, K., 2014, Rise and fall of late Pleistocene pluvial lakes in response to reduced evaporation and precipitation: Evidence from Lake Surprise, California: Bulletin of the Geological Society of America, v. 126,

- no. 11-12, p. 1387–1415.
- Kageyama, M., Braconnot, P., Bopp, L., Caubel, A., Foujols, M.-A., Guilyardi, E., Khodri, M., Lloyd, J., Lombard, F., Mariotti, V., Marti, O., Roy, T., and Woillez, M.-N., 2013, Mid-Holocene and Last Glacial Maximum climate simulations with the IPSL model—part I: comparing IPSL\_CM5A to IPSL\_CM4: Climate dynamics, v. 40, no. 9-10, p. 2447–2468.
- Kamae, Y., and Ueda, H., 2012, Mid-Pliocene global climate simulation with MRI-CGCM2.3: set-up and initial results of PlioMIP Experiments 1 and 2: Geoscientific Model Development, v. 5, no. 3, p. 793–808.
- Knott, J.R., Machette, M.N., Klinger, R.E., Sarna-Wojcicki, A.M., Liddicoat, J.C., Tinsley III, J.C., David, B.T., Ebbs, V.M., 2008, Reconstructing late Pliocene to middle Pleistocene Death Valley lakes and river systems as a test of Pupfish (Cyprinodontidae) dispersal hypotheses: The Geological Society of America Special Paper v. 439, p. 1-26.
- Koster, R.D., Fekete, B.M., Huffman, G.J., and Stackhouse, P.W., 2006, Revisiting a hydrological analysis framework with International Satellite Land Surface Climatology Project Initiative 2 rainfall, net radiation, and runoff fields: Journal of Geophysical Research, v. 111, no. 22, p. D22S05.
- Lehner, B., and Grill, G., 2013, Global river hydrography and network routing: baseline data and new approaches to study the world's large river systems (H. Habersack, D. Walling, & D. Haspel, Eds.): Hydrological Processes, v. 27, no. 15, p. 2171–2186.
- Lehner, B., Verdin, K., and Jarvis, A., 2008, New Global Hydrography Derived From Spaceborne Elevation Data: Eos, Transactions American Geophysical Union, v. 89, no. 10, p. 93–94.
- Linacre, E.T., 1977, A simple formula for estimating evaporation rates in various climates, using temperature data alone: Agricultural meteorology, v. 18, no. 6, p. 409–424.
- Messenger, M.L., Lehner, B., Grill, G., Nedeva, I., and Schmitt, O., 2016, Estimating the volume and age of water stored in global lakes using a geo-statistical approach.: Nature Communications, v. 7, p. 13603.
- Mifflin, M.D., and Wheat, M.M., 1979, Mifflin: Pluvial Lakes and Estimated Pluvial Climates of Nevada: Nevada Bureau of Mines and Geology Bulletin no. 94, 57 p.
- Milly, P.C.D., and Dunne, K.A., 2016, Potential evapotranspiration and continental drying: Nature Climate Change, v. 6, p. 946–949.
- Morcrette, J.-J., 1991, Radiation and cloud radiative properties in the European Centre for Medium Range Weather Forecasts forecasting system: Journal of Geophysical Research: Atmospheres, v. 96, no. D5, p. 9121-9132
- Munroe, J.S., and Laabs, B.J.C., 2013, Latest Pleistocene history of pluvial Lake Franklin, northeastern Nevada, USA: Geological Society of America Bulletin, v. 125, no. 3-4, p. 322–342.
- Orme, A.R., 2008, Pleistocene pluvial lakes of the American West: a short history of research: Geological Society, London, Special Publications, v. 301, no. 1, p. 51–78.
- Phillips, F.M., 2008, Geological and hydrological history of the paleo-Owens River drainage since the late Miocene: The Geological Society of America Special Paper v. 439, p. 115-150.
- Reheis, M.C., 1999, Extent of Pleistocene lakes in the western Great Basin: U.S. Geological Survey Miscellaneous Field Studies Map MF-2323, scale 1:800,000, 1 sheet.
- Reheis, M.C., Sarna-Wojcicki, A.M., Reynolds, R.L., Repenning, C.A., Mifflin, M.D., 2002,

- Pliocene to middle Pleistocene lakes in the Western Great Basin: Ages and connections, *in* Hershler, R., Madsen, D.B., Currey, D.R., eds., Great basin aquatic systems history. Smithsonian Institution Press, Washington D.C., p. 53-108.
- Reheis, M.C., Adams, K.D., Oviatt, C.G., and Bacon, S.N., 2014, Pluvial lakes in the Great Basin of the western United States-a view from the outcrop: *Quaternary Science Reviews*, v. 97, p. 33–57.
- Roderick, M.L., Sun, F., Lim, W.H., and Farquhar, G.D., 2014, A general framework for understanding the response of the water cycle to global warming over land and ocean: *Hydrology and Earth System Sciences*, v. 18, no. 5, p. 1575–1589.
- Roderick, M.L., Greve, P., Farquhar, G.D., 2015, On the assessment of aridity with changes in atmospheric CO<sub>2</sub>: *Water Resources Research*, v. 51, no. 7, p. 5450-5463.
- Rosenbloom, N.A., Otto-Bliesner, B.L., Brady, E.C., and Lawrence, P.J., 2012, Simulating the mid-Pliocene Warm Period with the CCSM4 model: *Geoscientific Model Development Discussions*, v. 5, p. 4269–4303.
- Scheff, J., and Frierson, D. M. W., 2014, Scaling Potential Evapotranspiration with Greenhouse Warming: *Journal of Climate*, v. 27, no. 4, p. 1539-1558
- Smith, G.R., 1981, Late Cenozoic Freshwater Fishes of North America: *Annual Review of Ecology and Systematics*, v. 12, p. 163-193.
- Soller, D.R., Reheis, M.C., Garrity, C.P., and Van Sistine, D.R., 2009, Map database for surficial materials in the conterminous United States: U.S. Geological Survey Data Series 425, scale 1: 5,000,000.
- Stepanek, C., and Lohmann, G., 2012, Modelling mid-Pliocene climate with COSMOS: *Geoscientific Model Development*, v. 5, no. 5, p. 1221–1243.
- Sueyoshi, T., Ohgaito, R., Yamamoto, A., Chikamoto, M.O., Hajima, T., Okajima, H., Yoshimori, M., Abe, M., O'ishi, R., Saito, F., Watanabe, S., Kawamiya, M., and Abe-Ouchi, A., 2013, Set-up of the PMIP3 paleoclimate experiments conducted using an Earth system model, MIROC-ESM: *Geoscientific Model Development*, v. 6, no. 3, p. 819-836.
- Thompson, R.S., 1992, Palynological data from a 989-FT (301-M) core of Pliocene and Early Pleistocene sediments from Bruneau, Idaho, U.S. Geological Survey Open File Report 92-713, 28 p.
- Voldoire, A., Sanchez-Gomez, E., Méliá, D.S.Y., Decharme, B., Cassou, C., Sénési, S., Valcke, S., Beau, I., Alias, A., Chevallier, M., Déqué, M., Deshayes, J., Douville, H., Fernandez, E., et al., 2013, The CNRM-CM5.1 global climate model: description and basic evaluation: *Climate dynamics*, v. 40, no. 9-10, p. 2091–2121.
- Williams, T.R., and Bedinger, M.S., 1984, Selected geologic and hydrologic characteristics of the Basin and Range Province, western United States; Pleistocene lakes and marshes: *IMAP 1522-D*, scale 1:2,500,000, 1 sheet.
- Yukimoto, S., Adachi, Y., Hosaka, M., Sakami, T., Yoshimura, H., Hirabara, M., Tanaka, T.Y., Shindo, E., Tsujino, H., Deushi, M., Mizuta, R., Yabu, S., Obata, A., Nakano, H., et al., 2012, A New Global Climate Model of the Meteorological Research Institute: MRI-CGCM3–Model Description and Basic Performance: *Journal of the Meteorological Society of Japan*, v. 90A, no. 0, p. 23–64.
- Zhang, Z., and Yan, Q., 2012, Pre-industrial and mid-Pliocene simulations with NorESM-L: AGCM simulations: *Geoscientific Model Development*, v. 5, no. 4, p. 1033–1043.
- Zhang, Z.S., Nisancioglu, K., Bentsen, M., Tjiputra, J., Bethke, I., Yan, Q., Risebrobakken, B.,

- Andersson, C., and Jansen, E., 2012, Pre-industrial and mid-Pliocene simulations with NorESM-L: Geoscientific Model Development, v. 5, no. 2, p. 523–533.
- Zhou, T., Chen, X., Dong, L., Wu, B., Man, W., Zhang, L., Lin, R., Yao, J., Song, F., and Zhao, C., 2014, Chinese contribution to CMIP5: An overview of five Chinese models' performances: Journal of Meteorological Research, v. 28, no. 4, p. 481–509.
